# Supplementary material
Source: MDPI journal article supplement (https://www.mdpi.com/2072-4292/12/17/2687)
Supplement: s1 [file s1]

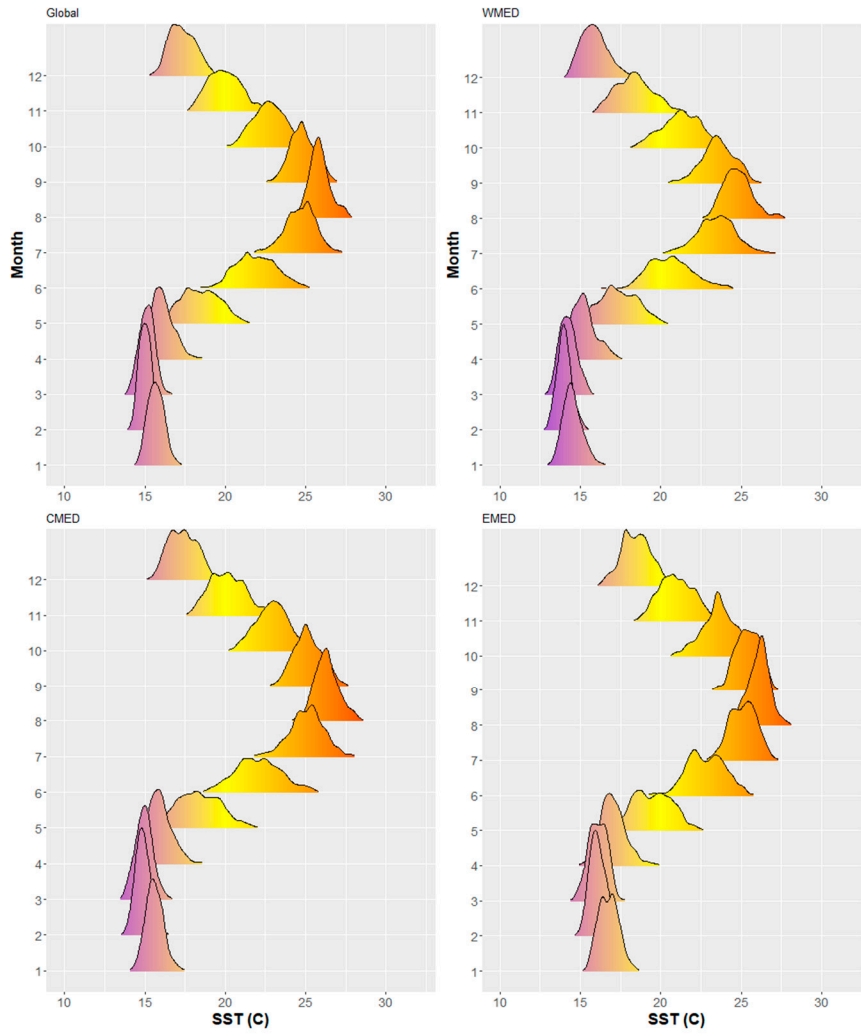

**Figure S1.** Monthly density plot for the mean Mediterranean SST in global, Western, Central and Eastern basins.

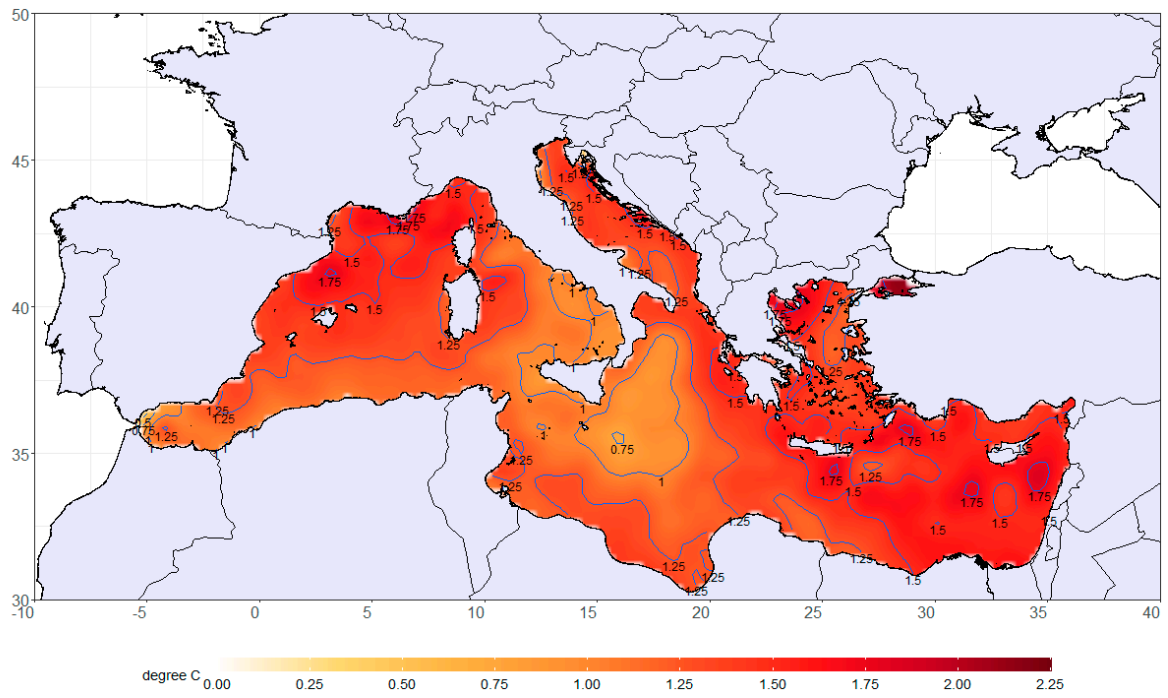

**Figure S2.** Accumulated warming from the linear tendency of the SST trend component from January 1982 to December 2019.

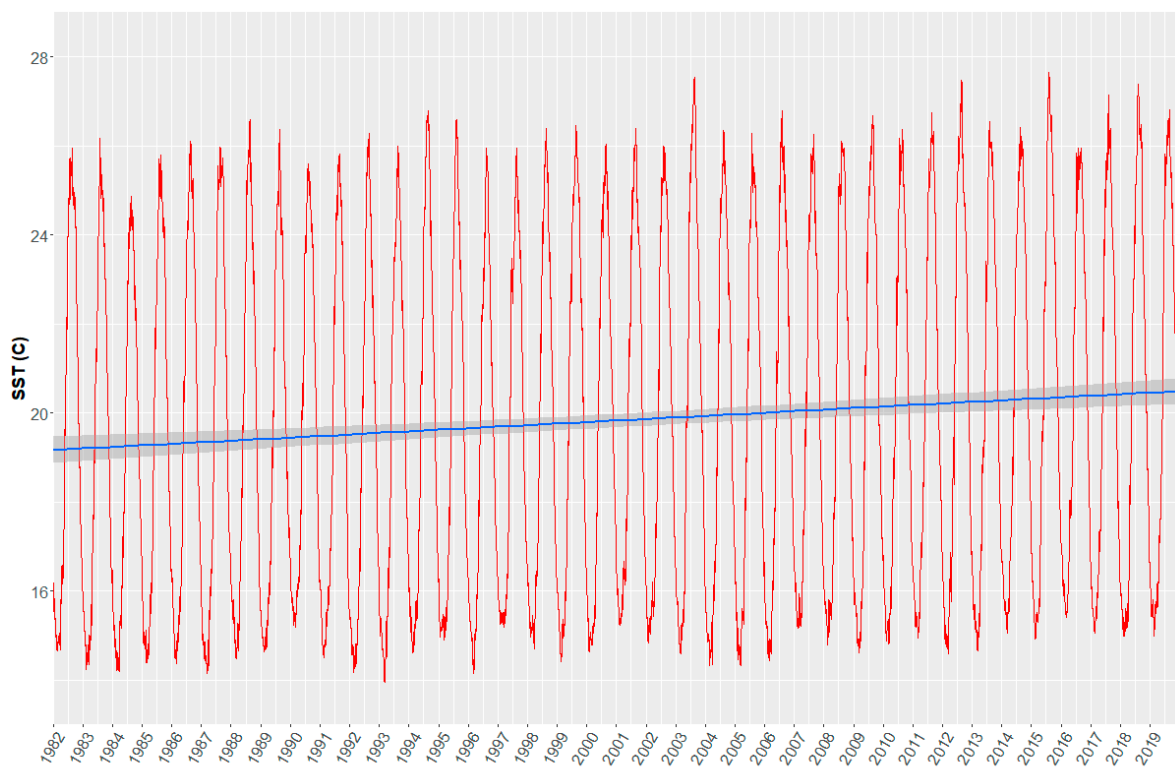

**Figure S3.** Mediterranean SST time series and linear regression (at 99% confidence level) for 1982–2019 for the global Mediterranean basin.
